# Supplementary material for: Antifungal and Phytotoxic Activities of Isolated Compounds from Helietta parvifolia Stems
Source: MDPI journal article supplement (doi:10.3390/molecules28237930), 2023-12-04
Supplement: s1 [file s1]

## **Supplementary material**

### **Antifungal and Phytotoxic activities of isolated compounds from *Helietta parvifolia* stems.**

Victor Pena Ribeiro<sup>1,2</sup>, Joanna Bajsa-Hirschel<sup>2</sup>, Prabin Tamang<sup>2</sup>, Kumudini Meepagala<sup>2\*</sup>  
Stephen O. Duke<sup>3</sup>

<sup>1</sup>ORISE Fellow-Agricultural Research Service, U.S. Department of Agriculture, Natural Products Utilization Research Unit, P.O. Box 1848, University, MS, 38677, USA

<sup>2</sup>Agricultural Research Service, U.S. Department of Agriculture, Natural Products Utilization Research Unit, P.O. Box 1848, University, MS, 38677, USA

<sup>3</sup>National center for Natural products Research, University, MS 38677, USA

**Abstract:** The identification of natural and environmentally friendly pesticides is a key area of interest for the agrochemical industry, with many potentially active compounds being sourced from numerous plant species. In this study, we report the bioassay-guided isolation and identification of phytotoxic and antifungal compounds from the ethyl acetate extract of *Helietta parvifolia* stems. We identified eight compounds, consisting of two coumarins and six alkaloids. Among these, a new alkaloid, 2-hydroxy-3,6,7-trimethoxyquinoline-4-carbaldehyde (6), was elucidated, along with seven known compounds. The phytotoxicity of purified compounds was evaluated, and chalepin (4) was active against *Agrostis stolonifera* at 1 mM with 50% inhibition of seed germination and reduced *Lemna pausicotata* (duckweed) growth by 50% (IC<sub>50</sub>) at 168 µM. Additionally, we evaluated the antifungal activity against the fungal plant pathogen *Colletotrichum fragariae* using a thin-layer chromatography bioautography assay, which revealed that three isolated furoquinoline alkaloids (flindersiamine (3), kokusagenine (7), maculine (8) among the isolated compounds, had the strongest inhibitory effects on the growth of *C. fragariae* at all tested concentrations. Our results indicate that these active natural compounds (3), (4), (7), and (8) could be scaffolds for production of more active pesticides with better physicochemical properties.

**Keywords:** *Helietta parvifolia*, herbicidal, fungicidal.

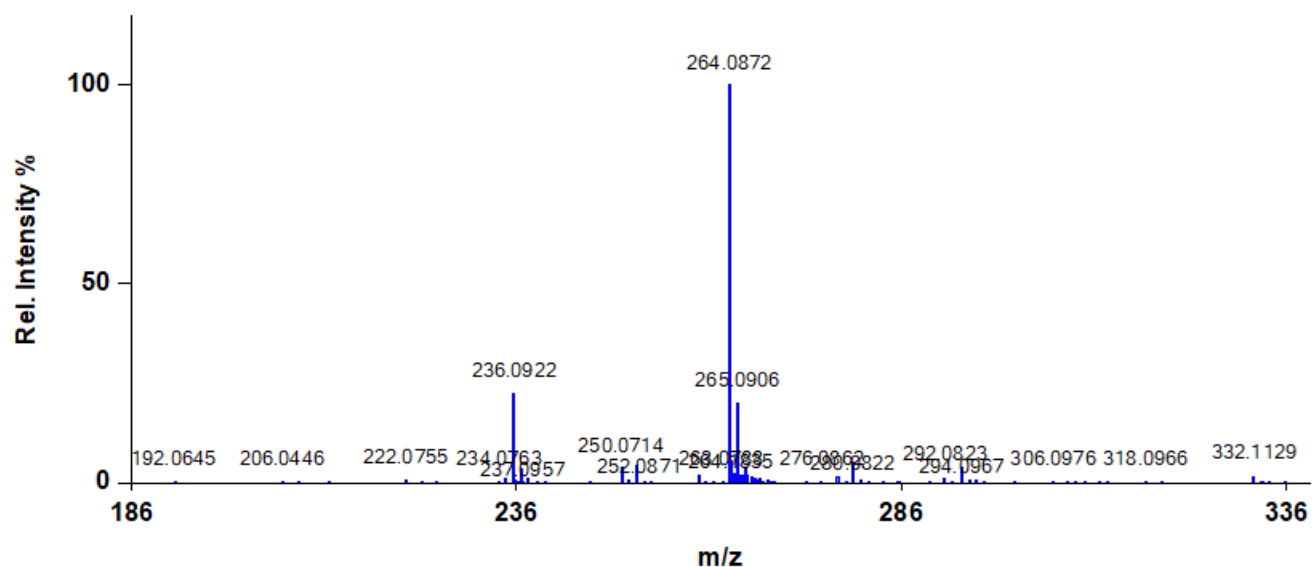

#### Elemental Compositions

Element Limits: C 0/50 H 0/100 O 0/10 N 0/10

Tolerance: 2 mmu Even or odd electron ion or both: Both

Electron correction: None. Charges: 1

Minimum unsaturation: -1 Maximum unsaturation: 100

| Calc. m/z  | Abund % | mmu  | Peaks | Score    | DBE  | Composition | NIST |
|------------|---------|------|-------|----------|------|-------------|------|
| 264.087197 | 0.61    | 0.04 | 3     | 0.000770 | 7.5  | C13H14O5N1  | 0    |
| 264.087190 | 0.46    | 0.14 | 3     | 0.002216 | 13.0 | C12H8N8     | 0    |
| 264.088533 | 0.33    | 0.74 | 3     | 0.008270 | 12.5 | C14H10O1N5  | 0    |
| 264.085854 | 0.64    | 0.73 | 4     | 0.011604 | 8.0  | C11H12O4N4  | 0    |
| 264.089040 | 1.84    | 1.12 | 3     | 0.068776 | 0.0  | H12O7N10    | 0    |

**Figure S1.** HR-DART-MS of compound **6** in positive mode

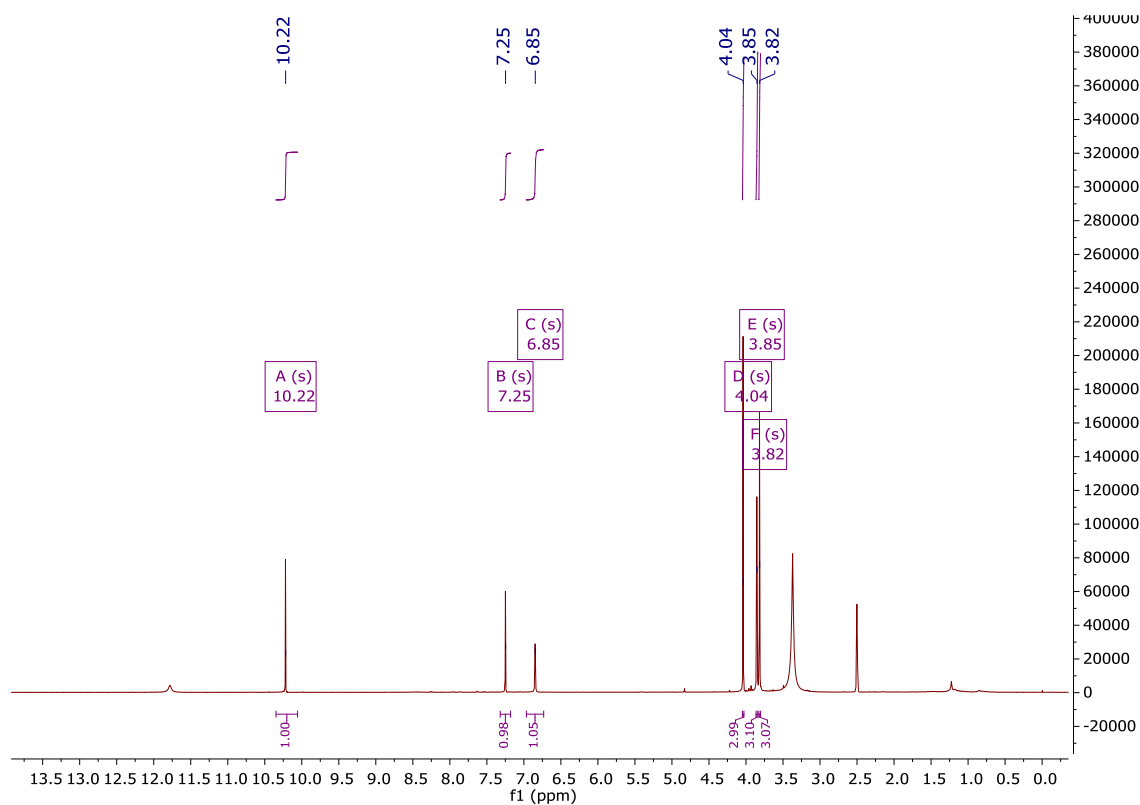

**Figure S2.** <sup>1</sup>H NMR spectrum of compound **6** in DMSO-d<sub>6</sub> (400 MHz).

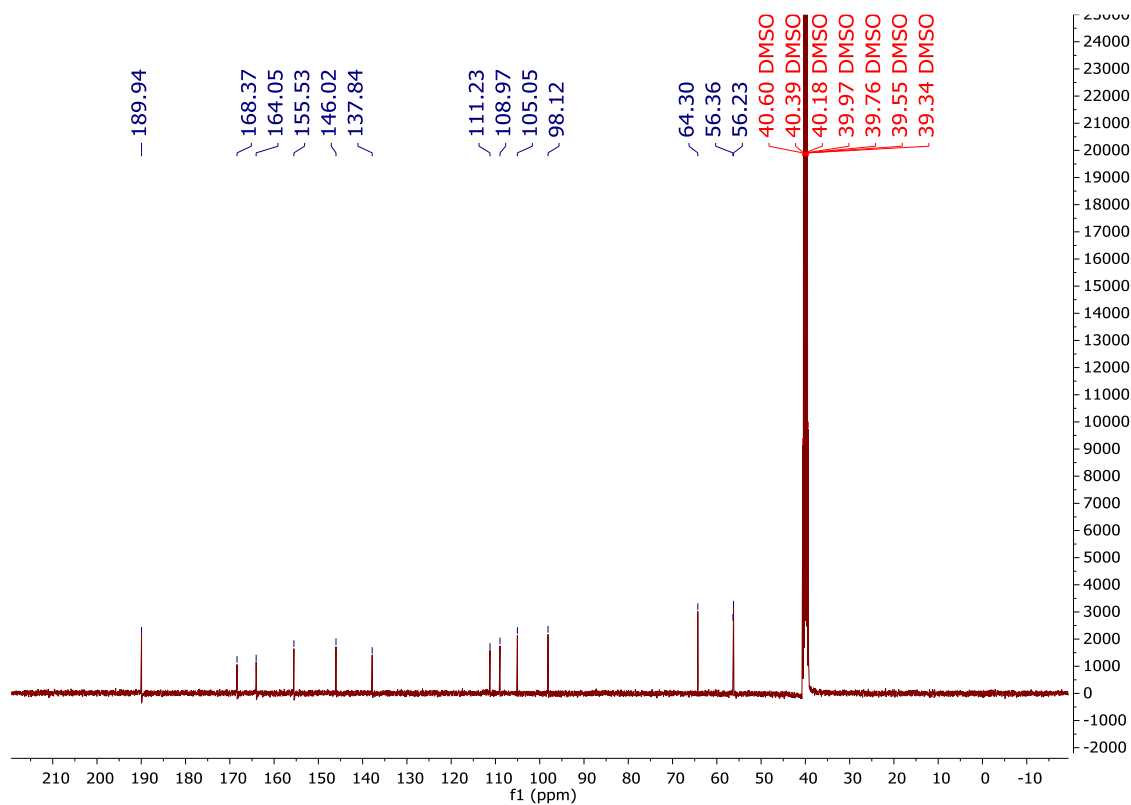

**Figure S3.** <sup>13</sup>C NMR spectrum of compound **6** in DMSO-d<sub>6</sub> (100 MHz).

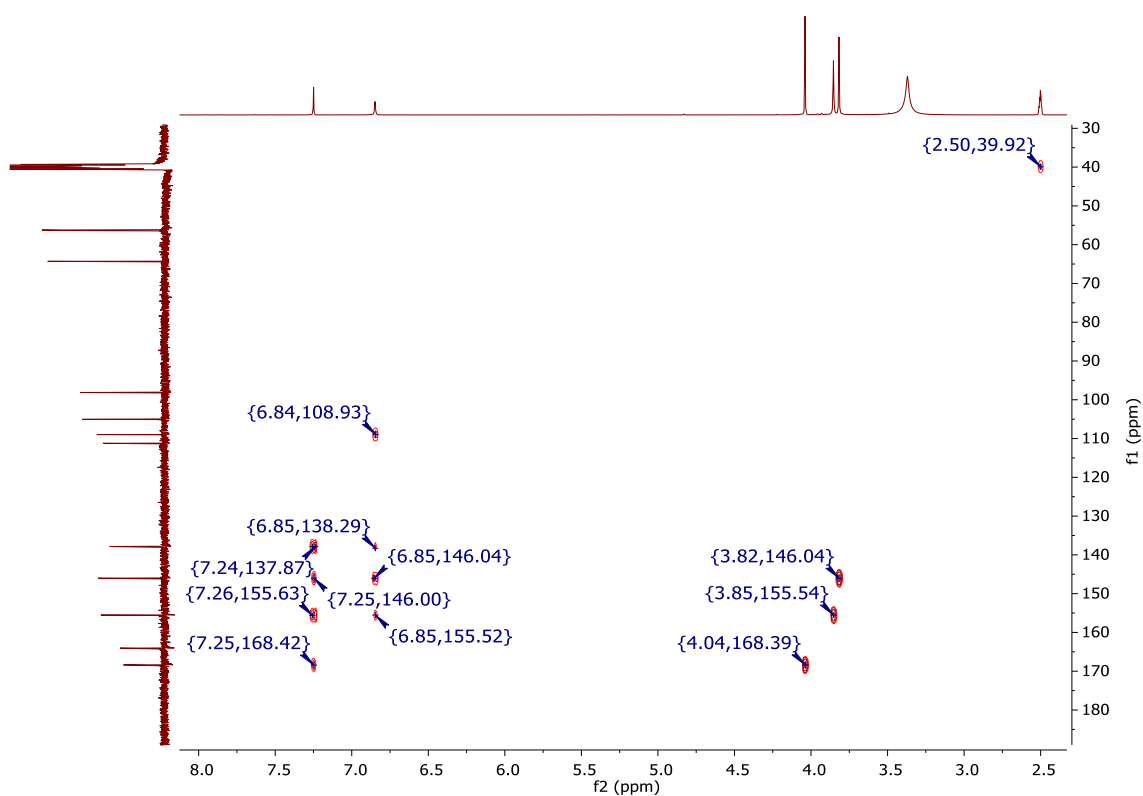

**Figure S4.** HMBC NMR spectrum of compound **6** in DMSO-d<sub>6</sub>

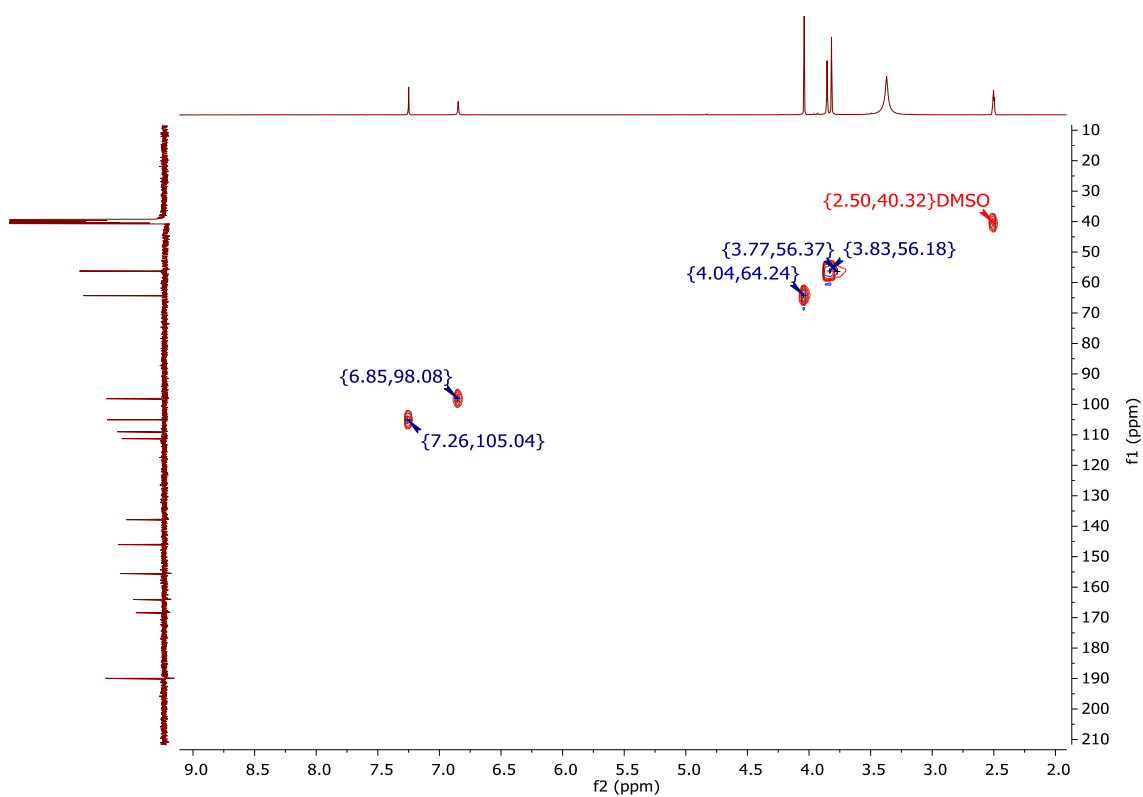

**Figure S5.** HSQC NMR spectrum of compound **6** in DMSO-d<sub>6</sub>
